# Supplementary material for: Anti-Hyperalgesic Efficacy of Acetyl L-Carnitine (ALCAR) Against Visceral Pain Induced by Colitis: Involvement of Glia in the Enteric and Central Nervous System
Source: MDPI journal article supplement (doi:10.3390/ijms241914841), 2023-10-02
Supplement: s1 [file s1]

## Supplementary Material

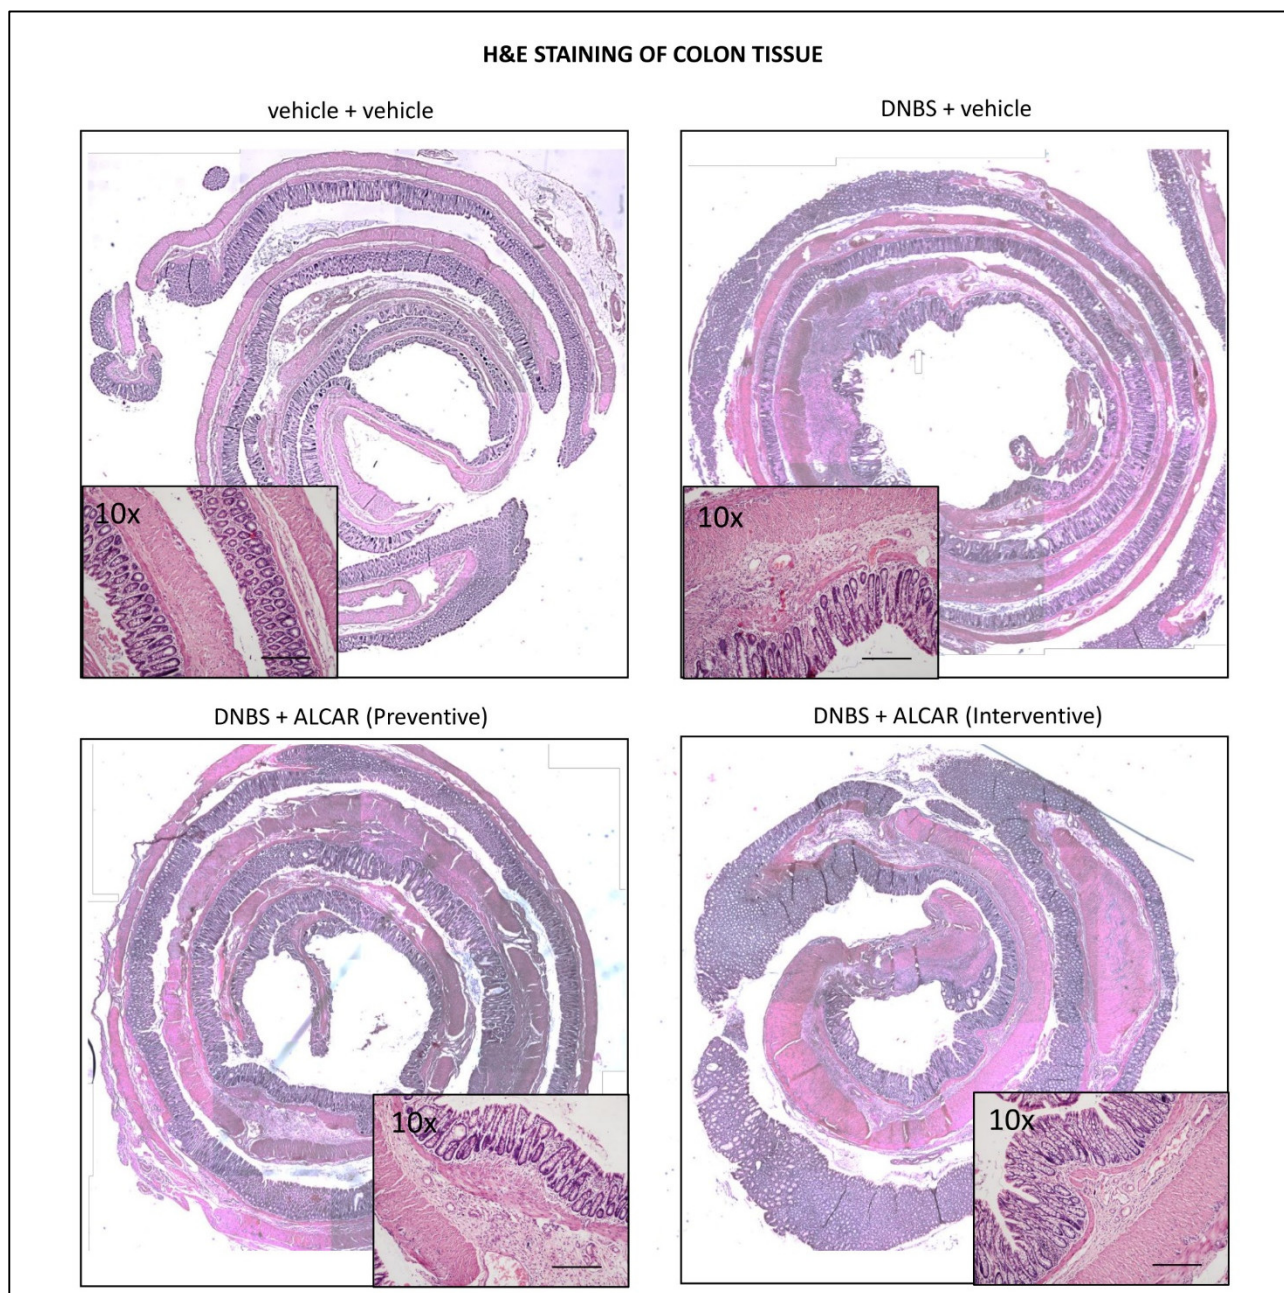

**Figure S1.** Representative images of H&E-stained colon of each experimental group. ALCAR ( $100 \text{ mg kg}^{-1} \text{ s.c.}$ ) was administered twice daily in the DNBS-treated animals, according to the preventive and the interventive protocol, respectively; then tissues were collected on Day 16. The figure shows the H&E-stained “Swiss Role” of the colon where the images (Original magnification: 10 $\times$ ; insert) used for the analysis of colon damage were taken from.

## GIEMSA STAINING OF COLON TISSUE

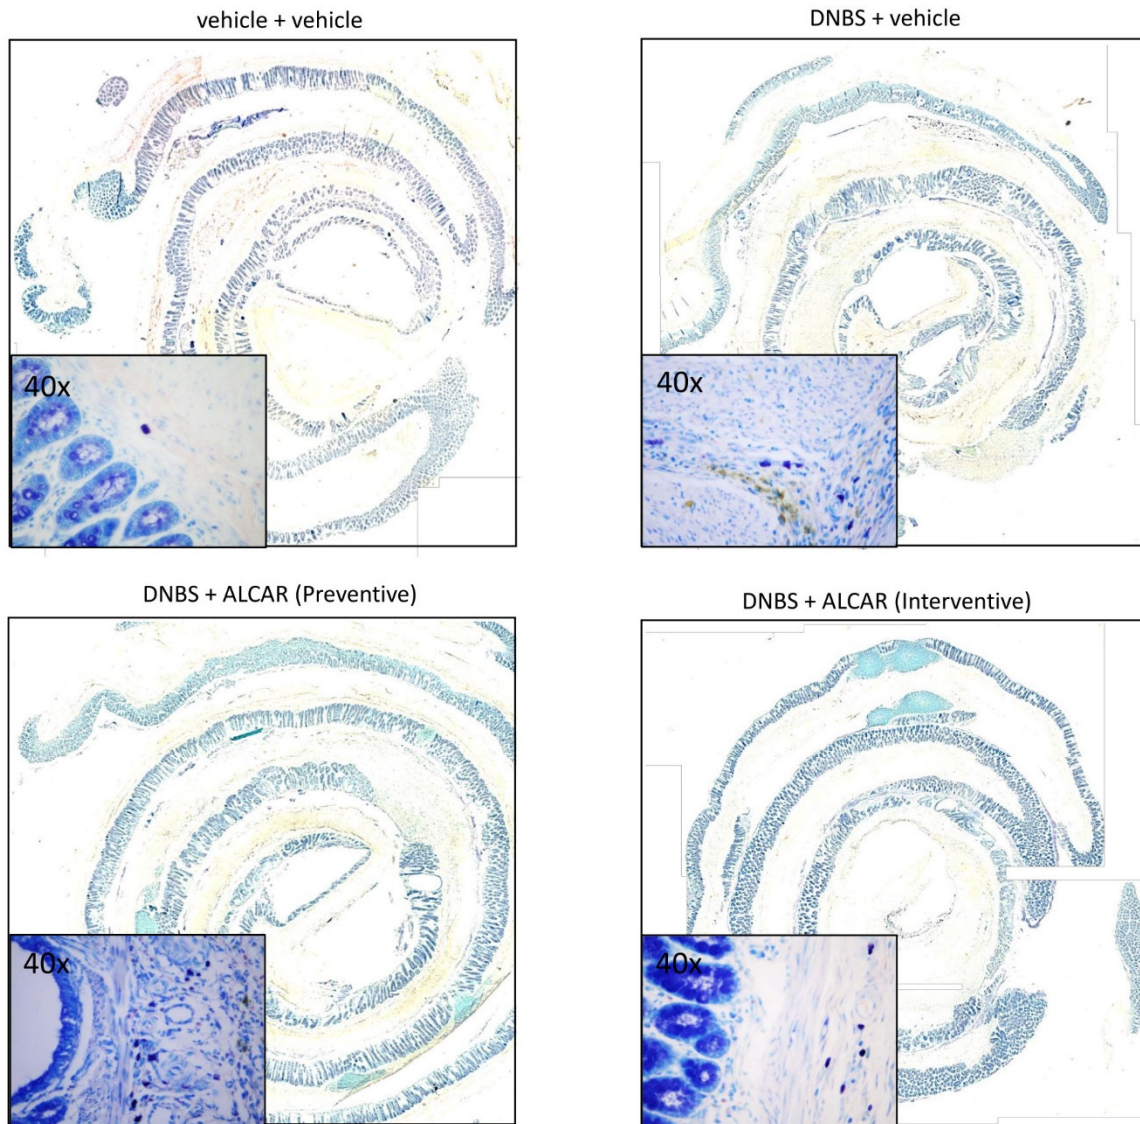

**Figure S2.** Representative images of GIEMSA-stained colon of each experimental group. ALCAR ( $100 \text{ mg kg}^{-1} \text{ s.c.}$ ) was administered twice daily in the DNBS-treated animals, according to the preventive and the interventive protocol, respectively; then tissues were collected on Day 16. The figure shows the GIEMSA-stained “Swiss Role” of the colon where the images (Original magnification:  $10\times$ ; insert) used for the analysis of mast cell and eosinophils density were taken from.



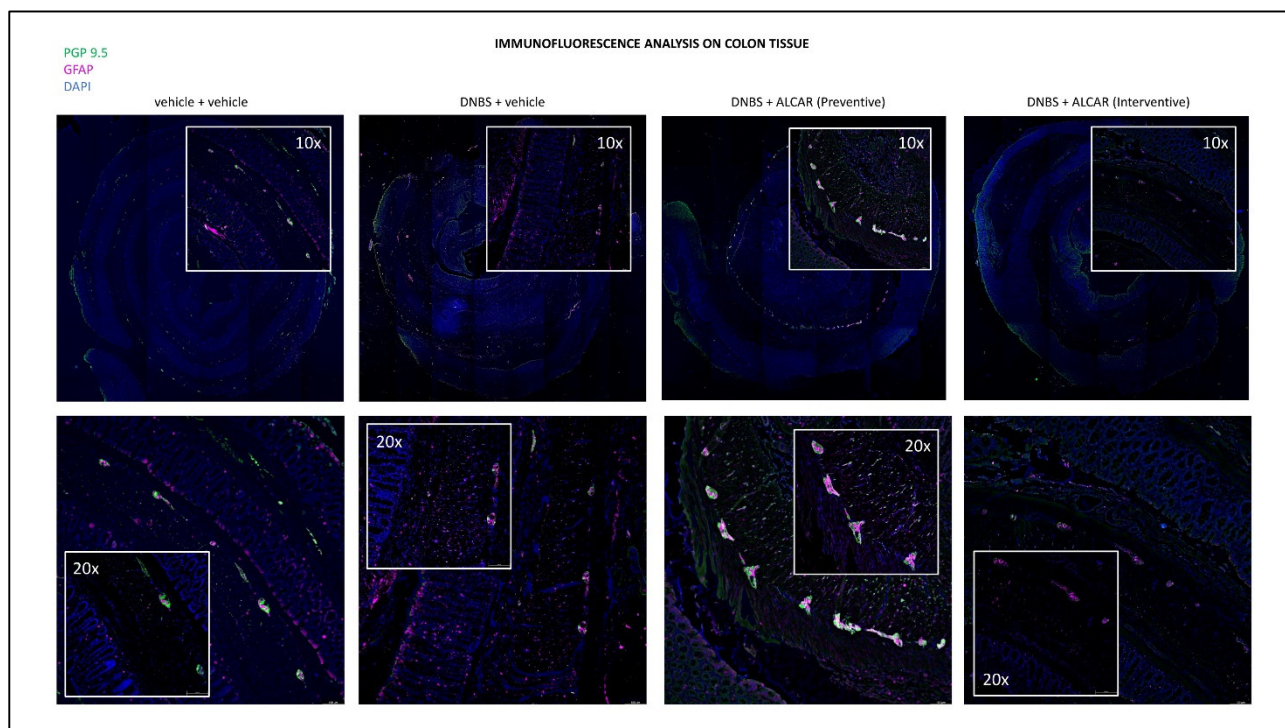

**Figure S3.** Representative images of PGP9.5 and GFAP expression in the colon of each experimental group. ALCAR ( $100 \text{ mg kg}^{-1} \text{ s.c.}$ ) was administered twice daily in the DNBS-treated animals, according to the preventive and the interventive protocol, respectively; then tissues were collected on Day 16. The figure shows the overview of the “Swiss Role” of colon and the area (Original magnification: 10 $\times$ ; insert above) where the immunofluorescence images (Original magnification: 20 $\times$ ; below) used for the analysis of PGP9.5 and GFAP expression were taken from. PGP9.5 (green), GFAP (purple) and DAPI (blue; nuclei marker).

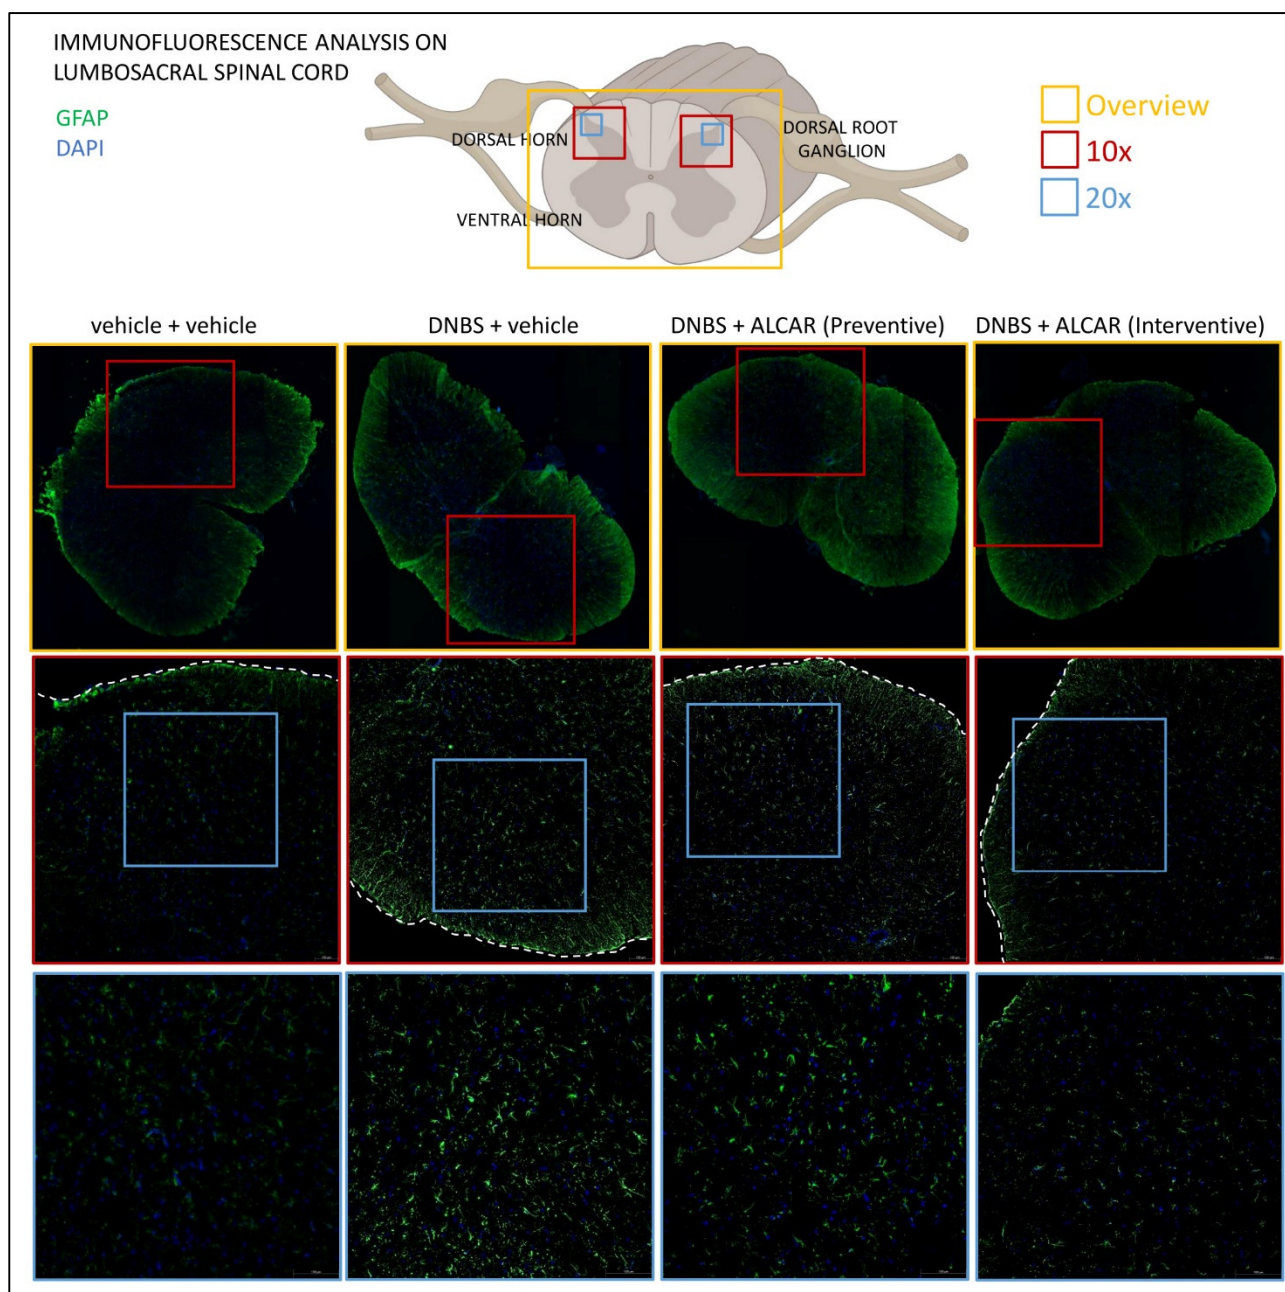

**Figure S4.** Representative images of GFAP expression in the dorsal horn of the spinal cord of each experimental group. ALCAR ( $100 \text{ mg kg}^{-1} \text{ s.c.}$ ) was administered twice daily in the DNBS-treated animals, according to the preventive and the interventive protocol, respectively; then tissues were collected on Day 16. The figure shows the overview (above) of the spinal cord and the area of the dorsal horn of the spinal cord (Original magnification: 10 $\times$ ; middle) where the immunofluorescence images (Original magnification: 20 $\times$ ; below) used for the analysis of GFAP expression were taken from. GFAP (green) and DAPI (blue; nuclei marker).



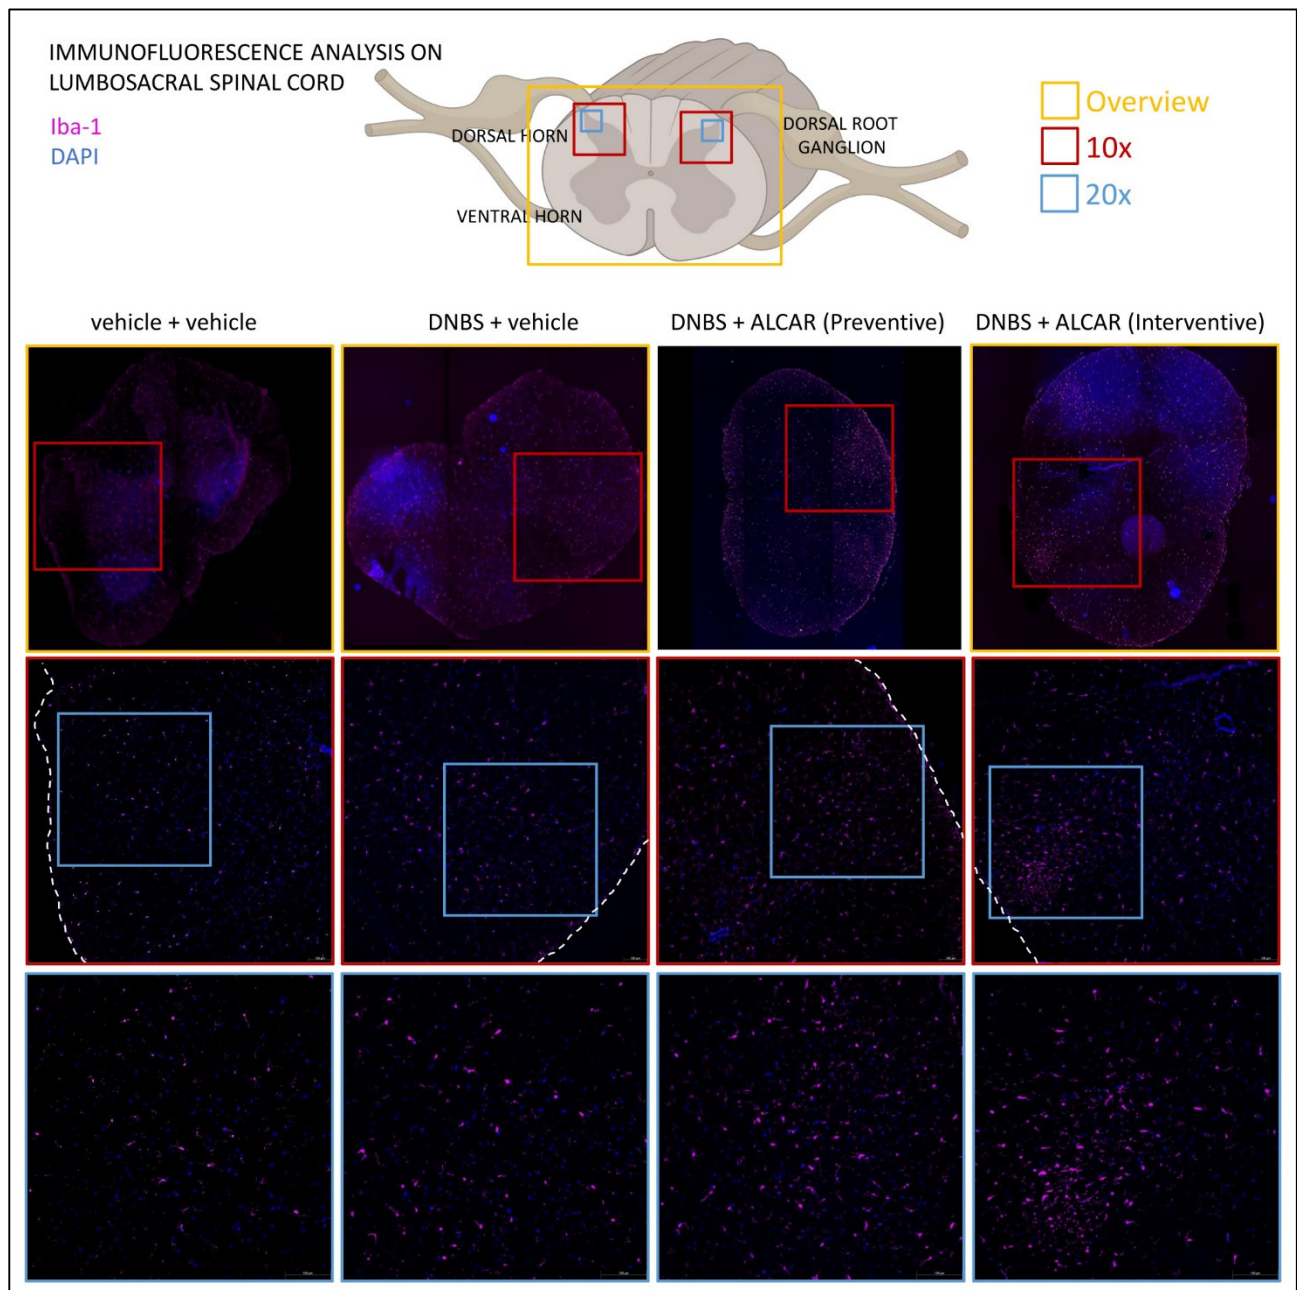

**Figure S5.** Representative images of Iba-1 expression in the dorsal horn of the spinal cord of each experimental group. ALCAR ( $100 \text{ mg kg}^{-1} \text{ s.c.}$ ) was administered twice daily in the DNBS-treated animals, according to the preventive and the interventive protocol, respectively; then tissues were collected on Day 16. The figure shows the overview (above) of the spinal cord and the area of the dorsal horn of the spinal cord (Original magnification: 10 $\times$ ; middle) where the immunofluorescence images (Original magnification: 20 $\times$ ; below) used for the analysis of Iba-1 expression were taken from. Iba-1 (purple) and DAPI (blue; nuclei marker).
